# Supplementary material for: IFN-λ and microRNAs are important modulators of the pulmonary innate immune response against influenza A (H1N2) infection in pigs
Source: PLoS One. 2018 Apr 20;13(4):e0194765. doi: 10.1371/journal.pone.0194765 (PMC5909910; doi:10.1371/journal.pone.0194765)
Supplement: S2 Table — Underlined, bold nucleotides highlights differences between porcine and human sequences. Seed sequences (nucleotides 2–7) are highlighted in upper case. (XLSX) [file pone.0194765.s003.xlsx]

## Sheet: Sheet1
S2 Table. Comparison of porcine and human miRNA sequences for those applied in miRNA-mRNA interaction analysis. Underlined, bold nucleotides highlights differences between porcine and human sequences. Seed sequences (nucleotides 2-7) are highlighted in upper case.
miRBase accession number	miRNA name	miRNA sequence
MIMAT0002141	ssc-miR-7	uGGAAGAcuagugauuuuguuguu
MIMAT0000252	hsa-miR-7-5p	uGGAAGAcuagugauuuuguugu
MIMAT0007753	ssc-miR-15a	uAGCAGCacauaaugguuugu
MIMAT0000068	hsa-miR-15a-5p	uAGCAGCacauaaugguuugug
MIMAT0002161	ssc-miR-18a	uAAGGUGcaucuagugcagaua
MIMAT0000072	hsa-miR-18a-5p	uAAGGUGcaucuagugcagauag
MIMAT0002165	ssc-miR-21	uAGCUUAucagacugauguuga
MIMAT0000076	hsa-miR-21-5p	uAGCUUAucagacugauguuga
MIMAT0002137	ssc-miR-29b	uAGCACCauuugaaaucaguguu
MIMAT0000100	hsa-miR-29b-3p	uAGCACCauuugaaaucaguguu
	No porcine homolog annotated in miRBase
MIMAT0004676	hsa-miR-34b-3p	cAAUCACuaacuccacugccau
MIMAT0013916	ssc-miR-34c	aGGCAGUguaguuagcugauugc
MIMAT0000686	hsa-miR-34c-5p	aGGCAGUguaguuagcugauugc
MIMAT0013909	ssc-miR-92b-3p	uAUUGCAcucgucccggccucc
MIMAT0003218	hsa-miR-92b-3p	uAUUGCAcucgucccggccucc
MIMAT0022963	ssc-miR-146a-5p	uGAGAACugaauuccauggguu
MIMAT0000449	hsa-miR-146a-5p	uGAGAACugaauuccauggguu
MIMAT0002127	ssc-miR-184	uGGACGGagaacugauaagggu
MIMAT0000454	hsa-miR-184	uGGACGGagaacugauaagggu
MIMAT0013895	ssc-miR-193a-3p	aACUGGCcuacaaagucccagu
MIMAT0000459	hsa-miR-193a-3p	aACUGGCcuacaaagucccagu
MIMAT0002146	ssc-miR-205	uCCUUCAuuccaccggagucug
MIMAT0000266	hsa-miR-205-5p	uCCUUCAuuccaccggagucug
MIMAT0022949	ssc-miR-221-5p	aCCUGGCauacaauguagauuucugu
MIMAT0004568	hsa-miR-221-5p	aCCUGGCauacaauguagauuu
	No porcine homolog annotated in miRBase
MIMAT0004570	hsa-miR-223-5p	cGUGUAUuugacaagcugaguu
MIMAT0022958	ssc-miR-296-3p	aGGGUUGggcggaggcuuucc
MIMAT0004679	hsa-miR-296-3p	gAGGGUUggguggaggcucucc
MIMAT0015711	ssc-miR-363	aAUUGCAcgguauccaucuguaa
MIMAT0000707	hsa-miR-363-3p	aAUUGCAcgguauccaucugua
	No porcine homolog annotated in miRBase
MIMAT0000728	hsa-miR-375	uUUGUUCguucggcucgcguga
MIMAT0013868	ssc-miR-378	aCUGGACuuggagucagaaggc
MIMAT0000732	hsa-miR-378a-3p	aCUGGACuuggagucagaaggc
	No porcine homolog annotated in miRBase
MIMAT0001541	hsa-miR-449a	uGGCAGUguauuguuagcuggu
	No porcine homolog annotated in miRBase
MIMAT0003327	hsa-miR-449b-5p	aGGCAGUguauuguuagcuggc
MIMAT0018382	ssc-miR-451	aAACCGUuaccauuacugaguu
MIMAT0001631	hsa-miR-451a	aAACCGUuaccauuacugaguu
MIMAT0025379	ssc-miR-551a	gCGACCCacucuugguuucc
MIMAT0003214	hsa-miR-551a	gCGACCCacucuugguuucca
	No porcine homolog annotated in miRBase
MIMAT0004801	hsa-miR-590-3p	uAAUUUUauguauaagcuagu
MIMAT0025382	ssc-miR-671-3p	uCCGGUUcucagggcuccacc
MIMAT0004819	hsa-miR-671-3p	uCCGGUUcucagggcuccacc
MIMAT0013945	ssc-miR-708-5p	aAGGAGCuuacaaucuagcuggg
MIMAT0004926	hsa-miR-708-5p	aAGGAGCuuacaaucuagcuggg
MIMAT0020596	ssc-miR-1343	cUCCUGGggcccgcacucucgc
MIMAT0019776	hsa-miR-1343-3p	cUCCUGGggcccgcacucucgc
MIMAT0028143	ssc-miR-7134-5p	aUGUCCGcggguucccuaucc
	No human homolog annotated in miRBase
